# Supplementary material for: A micro passive preconcentrator for micro gas chromatography
Source: Royal Society of Chemistry journal article supplement (doi:10.1039/d0an01485k), 2020-01-01
Supplement: d0an01485k1.pdf [file d0an01485k1.pdf]

## A Micro Passive Preconcentrator for Micro Gas Chromatography

Changhua Zhan,<sup>1,4</sup> Muhammad Akbar,<sup>1,4</sup> Robert Hower,<sup>1,4</sup> Nicolas Nuñovero,<sup>1,4</sup> Joseph Potkay,<sup>2,4\*</sup> Edward T. Zellers,<sup>1,3,4\*</sup>

<sup>1</sup> *Department of Environmental Health Sciences, University of Michigan, Ann Arbor, MI, USA*

<sup>2</sup> *Department of Surgery, University of Michigan, Ann Arbor, MI, USA*

<sup>3</sup> *Department of Chemistry, University of Michigan, Ann Arbor, MI, USA*

<sup>4</sup> *Center for Wireless Integrated MicroSensing & Systems (WIMS<sup>2</sup>), University of Michigan, Ann Arbor, MI, USA.*

*Corresponding authors: [ezellers@umich.edu](mailto:ezellers@umich.edu), ; [jpotkay@umich.edu](mailto:jpotkay@umich.edu)*

The following sections of this Electronic Supporting Information file present details related to the corresponding topics presented in the main article:

S1.  $\mu$ PP fabrication

S2. Test system and exposure chamber

S3. TGA set-up and procedure

S4. Temperature profiles

S5. TGA data/results and  $W_e$  values

S6. Desorption (transfer) profiles and efficiencies

S7. Modeling changes in  $S_e$  as a function of time and concentration

S8. Calculations of Fickian diffusion coefficients

S9. Tests with vapor mixtures

## S1. $\mu$ PP fabrication; $\mu$ PCF description

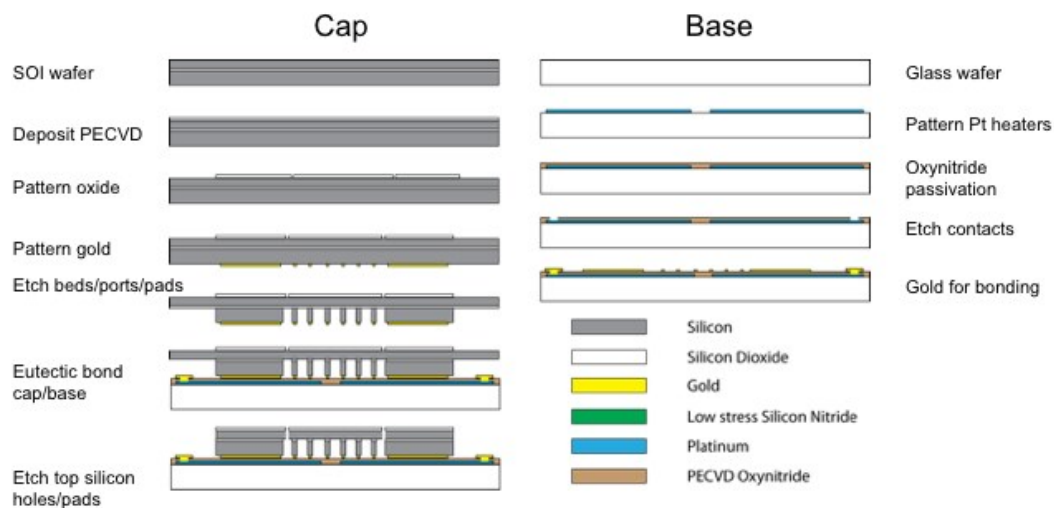

Figure S1. Summary of the fabrication process flow for the  $\mu$ PP device. Top SOI wafer layer thicknesses: device layer,  $180\mu\text{m}$ ; buried oxide layer,  $1.5\mu\text{m}$ ; handle layer,  $380\mu\text{m}$ . Bottom borofloat glass thickness was  $200\mu\text{m}$ .

The  $\mu$ PP fabrication process flow is summarized in Figure S1. The thicknesses of the three layers of the 4" silicon-on-insulator (SOI) wafer used to create the top substrate of the  $\mu$ PP are given in the caption of Figure S1. First, a  $1\text{-}\mu\text{m}$  thick silicon dioxide layer was deposited onto the top of the device-layer side of the SOI wafer using plasma enhanced chemical vapor deposition (PECVD). Photoresist was then deposited and patterned (i.e., exposed) to define the circular array (i.e., ring) of sampling apertures at the periphery of the active device area (o.d.  $\approx 4.3\text{ mm}$ ). Each aperture was defined as a  $50 \times 50\text{ }\mu\text{m}$  square spaced from laterally adjacent apertures by  $75\text{ }\mu\text{m}$ . Two concentric rings of apertures (120 outer, 100 inner) were patterned, and then an additional 17 apertures were added, evenly distributed just outside the outer ring to bring the total to 237 apertures (see Figures 1f and g in the main article for micrographs of the apertures). In the same step, the rectangular regions at the corners of the chip, corresponding to where the wire-bonding areas are located on the bottom substrate, were patterned. All exposed regions of PECVD oxide were then removed by reactive ion etching (RIE).

Next, a seed layer of Au was deposited onto the back (i.e., handle layer) side of the SOI wafer, patterned with photoresist and electroplated to a thickness of  $\sim 2\text{ }\mu\text{m}$  using a standard plating bath in the exposed areas. The Au seed layer was then stripped. Next, photoresist was patterned to define the adsorbent-bed cavities, retention pillars, wire-bonding regions, fill ports, and fluidic channel (please refer to Figure 1e and f in the main article) and these features were formed by deep-reactive-ion etching (DRIE) down to the buried oxide layer. Finally, the exposed buried oxide was etched away with buffered HF to ensure that when the aperture grid was later etched from the top side that the apertures extend through the top substrate.

Figure S2 shows the top substrate of the chip after DRIE. The pillars are  $\sim 180\ \mu\text{m}$  in diameter and spaced by  $\sim 130\ \mu\text{m}$ . The three fill ports and the fluidic channel are 460 and 170  $\mu\text{m}$  wide, respectively, at their narrowest points. The height of all features is 380  $\mu\text{m}$ .

The first step in processing the bottom (glass) wafer entailed depositing photoresist, patterning (exposing) the locations for the heaters, RTDs, and electrical traces out to the wire-bonding areas on the top surface. Ti and Pt at thicknesses of 100Å and 1000Å, respectively, were deposited and a standard lift-off procedure was used to remove the unwanted metal. A 2- $\mu\text{m}$  thick SiON (oxynitride) layer was then deposited by PECVD to serve as an electrical isolation layer. Next, the contact holes were patterned using photoresist and the oxynitride was etched away with buffered HF to expose the Pt metal for eventual wire bonding. Finally, a thin Au film was deposited and patterned by lift-off at the locations matching those of the top substrate needed for eutectic bonding (see Figure S3 for a micrograph of a portion of the bottom substrate prior to bonding).

The top and bottom substrates were then aligned using a contact aligner and bonded using Au-Si eutectic bonding.<sup>S1</sup> The apertures and wire-bonding regions previously patterned in the oxide on the top surface of the top substrate were then etched by DRIE using the remaining oxide as the etch mask. Finally, the wafers were diced using a dicing saw, and thoroughly cleaned using organic solvents, yielding devices such as that shown in Figure 1f (main article).

Note that the heater in the center of the chip and along the fluidic transfer channel were not used. An additional chip heater and RTD encircling  $\mu\text{PP}$  structure and intended for heating the chip outside of the active device area was also found to be unnecessary due to conductive heat transfer through the substrates.

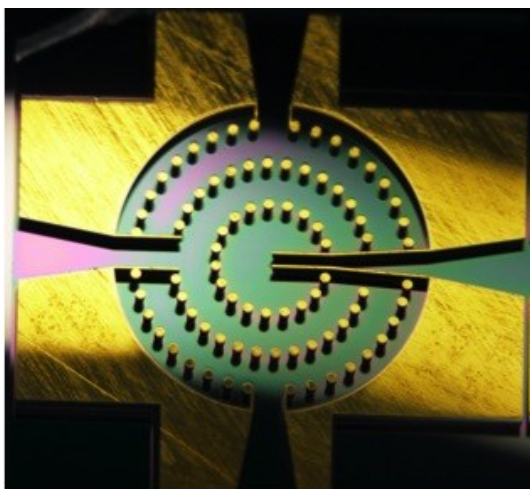

*Figure S2. Top substrate prior to wafer bonding, showing adsorbent cavities, adsorbent retention pillars, fill ports (3), and fluidic channel (right side). Au layer is where eutectic bonding to the bottom substrate will occur.*

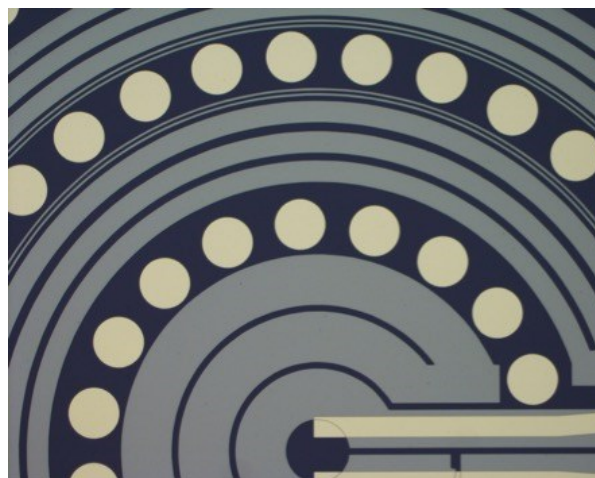

*Figure S3. Borofloat glass bottom substrate with heaters shown in gray and Au layer at the bases of the pillars and fluidic port where eutectic bonds will occur in white.*

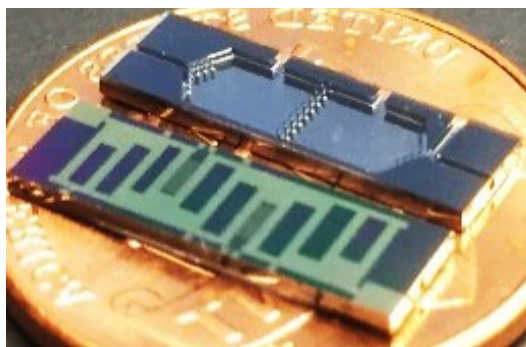

*Figure S4. Photo of  $\mu$ PCF. Lower image is the backside heater and upper image shows the two adsorbent cavities, fill ports, and fluidic channels of the unfilled device. See ref. S2 for more fab details. The tandem adsorbent cavities contain  $\sim 2.3$  mg each of C-X and C-B separated and retained within the chambers by pillars. An etched tee-junction at one end of the  $\mu$ PCF chip allows for vapor loading in one flow direction and desorption/injection in the other (i.e., with backflushing) by use of an integrated, thin-film heater on the backside operated under closed-loop control.*

## **S2. Test system and exposure chamber**

The test atmosphere generation system and associated components are shown schematically in Figure S5. The custom-made stainless-steel exposure chamber ( $12.7 \times 7.6 \times 3.9$  cm;  $\sim 42$  mL internal volume) used to house the  $\mu$ PP for performance tests is shown in Figure S6 with the cover plate (top layer) removed. The bottom plate has tapped inlet and outlet holes for gas flow, flanking a central 1"-diameter clearance hole for electrical interconnections between the PCB-mounted  $\mu$ PP and a routing PCB bolted to the underside of the bottom plate and sealed with a Teflon o-ring. The 11 contact pins on the routing PCB passing vertically through the central hole of the chamber floor plate serve as mechanical supports for the  $\mu$ PP carrier PCB "pedestal" and as the electrical interconnects.

The middle plate of the chamber was machined to create a chamfered diamond shaped cavity that defines the internal volume. A tapped hole in the side of the middle plate of the chamber accepts a PEEK fitting with a reverse ferrule that seals the (Microlumen-wrapped)  $\mu$ PP outlet capillary to the chamber wall. The outlet capillary extends through this fitting to one of the 6-port valve ports for directing the flow from the  $\mu$ PP to the  $\mu$ PCF during desorption and sample transfer. Teflon gaskets are used to seal the top and bottom plates to the middle plate with compression provided by a set of nuts and bolts.

At a flow rate of 1 L/min, the atmospheric concentration in the chamber can reach 95% of the equilibrium concentration within  $\sim 2$  min for m-xylene, as indicated by GC-FID measurements. The theoretical 95% mixing time is about 10 sec. The longer time required in practice maybe due to adsorption by the upstream 3-way solenoid valve. Consistent with this explanation, for less volatile test compounds, such as DEMP, the time to steady-state concentration was longer (i.e.,  $\sim 4$  min). After exposure, the testing chamber was purged with  $N_2$  for 4 min at 1 L/min, which was sufficient to remove any trace of residual vapor.

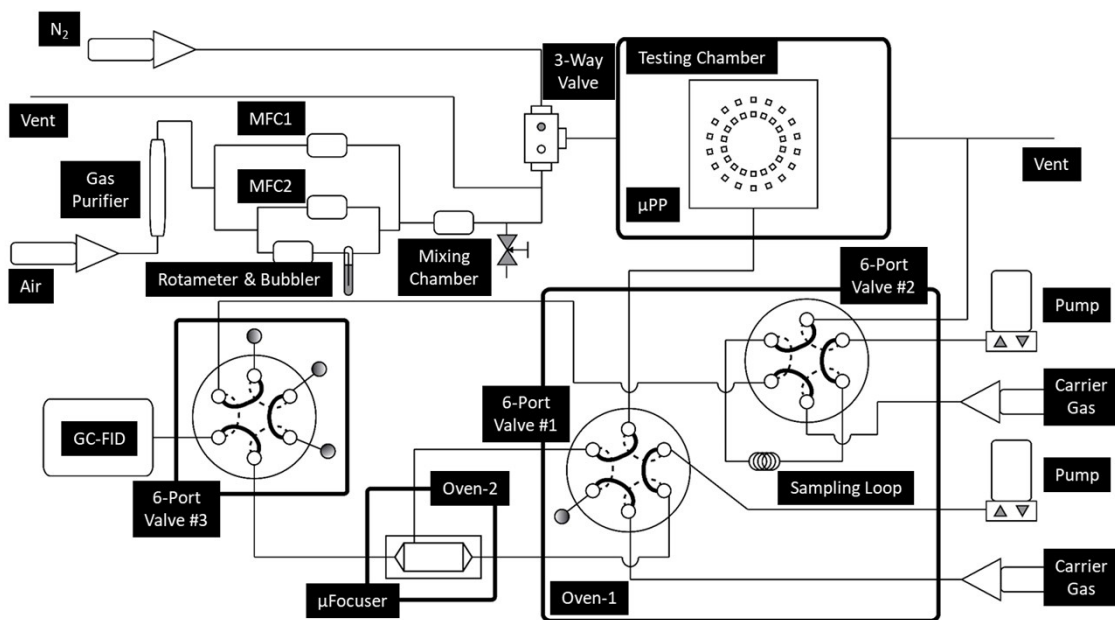

Figure S5. Diagram of the  $\mu$ PP test system. The three six-port valves can be switched to achieve the following three functions: 1) monitoring the concentration and composition of the test-chamber atmosphere; 2) transferring collected samples from the  $\mu$ PP to  $\mu$ PCF; 3) analyzing samples injected from  $\mu$ PCF by GC-FID.

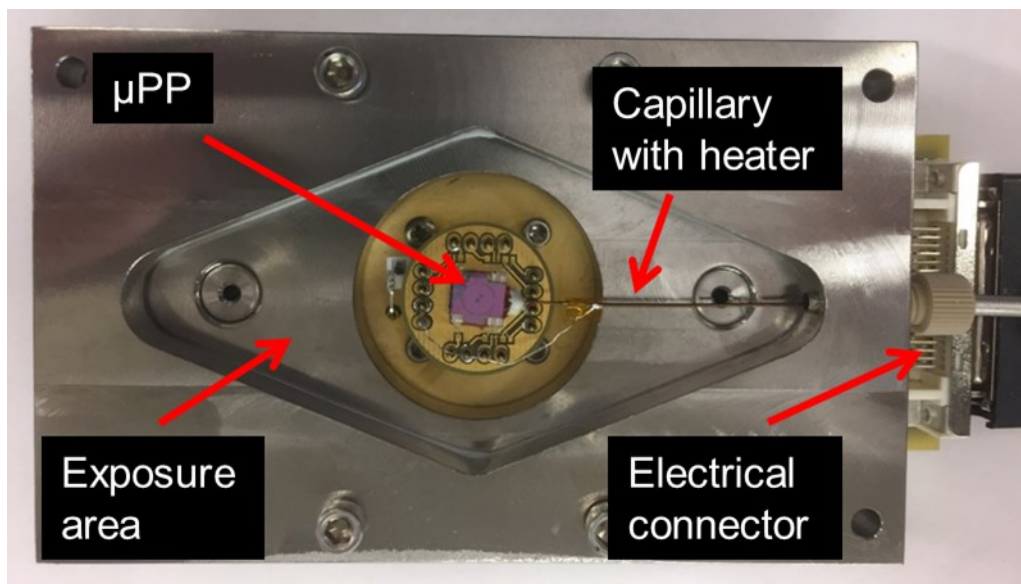

Figure S6. Photo of the exposure chamber with  $\mu$ PP mounted inside it.

### S3. TGA set-up and procedure

The TGA was used to measure the equilibrium adsorption capacity,  $W_e$ , of selected vapors as a function of concentration for each adsorbent material. The test atmosphere generation system described above was adapted for these experiments by directing the flow through tubing connected to the sample chamber within the TGA to allow real-time mass measurements during exposure,  $N_2$  purge, and then heating to desorb the vapors. For most tests,  $\sim 2.6$ - $2.9$  mg of the sieved adsorbent material (i.e., C-X or C-B) was loaded into the standard weighing pan of the TGA and suspended from the arm of the gravimetric mechanism. It was then heated to  $250^\circ C$  under a flow of  $N_2$  to precondition the sample for  $> 30$  min.

The flow of test atmosphere was divided so that a portion would flood the chamber containing the sample and a portion was sent to a sampling loop connected to a 6-port valve mounted on the GC. Samples were periodically injected into the GC over the course of each exposure to confirm the magnitude and stability of the exposure concentration. Since testing involved only individual compounds no column was used. Rather, a short segment of deactivated fused silica capillary (guard column) was used to connect the injection port to the FID.

For isotherm determinations, each concentration was tested individually and the mass uptake was monitored until a plateau was reached followed by thermal desorption to confirm recovery of the baseline. Then the next concentration was tested. Equilibration times were on the order a few hrs. For other tests, exposures were allowed to proceed for a certain time period, then an  $N_2$  purge was used to remove the vapor so that any off-gassing could be detected, and then the sample was heated to confirm recovery of the baseline.

### S4. Temperature profiles



A typical time-temperature profile for each of the three RTDs on the  $\mu$ PP is shown in Figure S7. Closed-loop control of the two cavity heaters allows precise control and coordination of the temperatures in both adsorbent beds. Modest heating rates were used so that it took about 6 sec to achieve the maximum temperature with no overshoot.

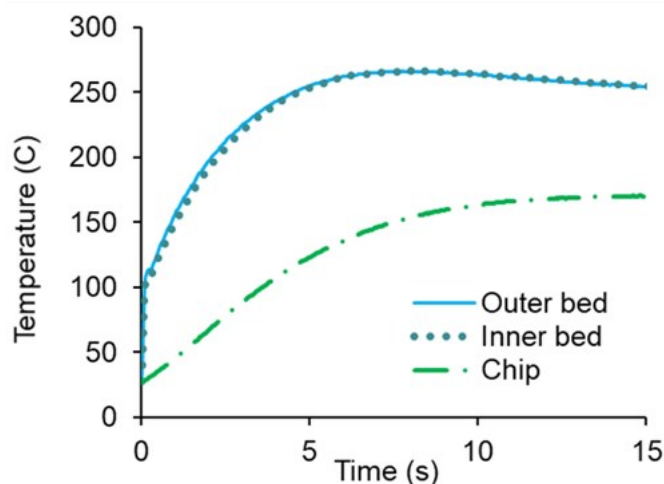

Figure S7. Profiles from the RTD readings for one heating sequence of the inner and outer adsorbent cavities, as well as the chip area (outside of the cavities) of the  $\mu$ PP device.

## S5. TGA data and $W_e$ values

Most studies of VOC adsorption on carbon adsorbents employ models based on the classical Langmuir adsorption isotherm:<sup>S3-S8</sup>

$$W_e = W_{e-max} \frac{b \times C}{1 + b \times C} \quad (\text{S-1})$$

where  $W_{e-max}$  is the maximum monolayer coverage capacity ( $\mu\text{g/g}$ ),  $b$  is the Langmuir isotherm constant ( $\text{L/mg}$ ), and  $C$  is the VOC concentration ( $\text{mg/m}^3$ ).

Figure S8 shows the adsorption isotherm for m-xylene on C-X over a concentration range of 0.9 to 1300  $\text{mg/m}^3$ . The  $W_e$  value increased with the increasing m-xylene concentration at a steadily decreasing rate and the isotherm was fit to the following Langmuir model, represented by the curve in Figure S8 ( $r^2 = 0.936$ ):

$$W_e (\mu\text{g/g}) = \frac{61000 (\mu\text{g/g}) \times 25 (\text{L/mg}) \times C (\text{mg/m}^3)}{1 + 25 (\text{L/mg}) \times C (\text{mg/m}^3)} \quad (\text{S-2})$$

Figure S9 shows that  $W_e$  is inversely proportional to the vapor pressure among four vapors of similar polarity with C-X: toluene, m-xylene, 1,2,4-TMB and n-decane at similar concentrations (4-6  $\text{mg/m}^3$ ).

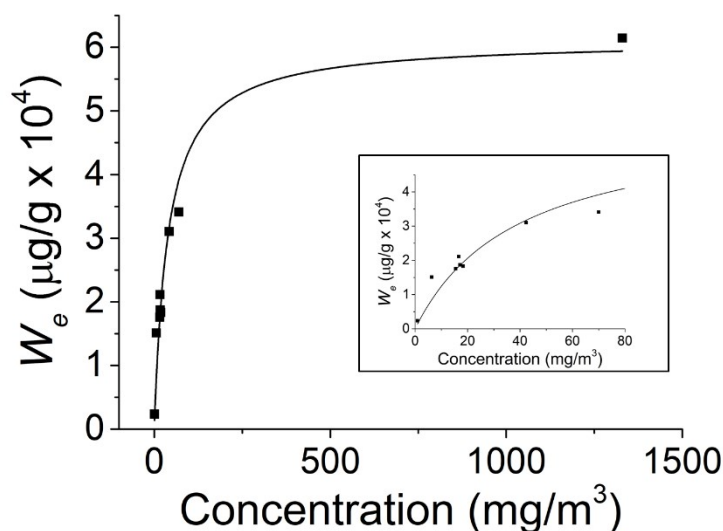

Figure S8.  $W_e$  values of C-X for exposure to different concentrations of *m*-xylene. The curve is the fitted to the Langmuir model in eq. S-2 ( $R^2 = 0.96$ ). Inset shows an enlargement of the lower concentration region.

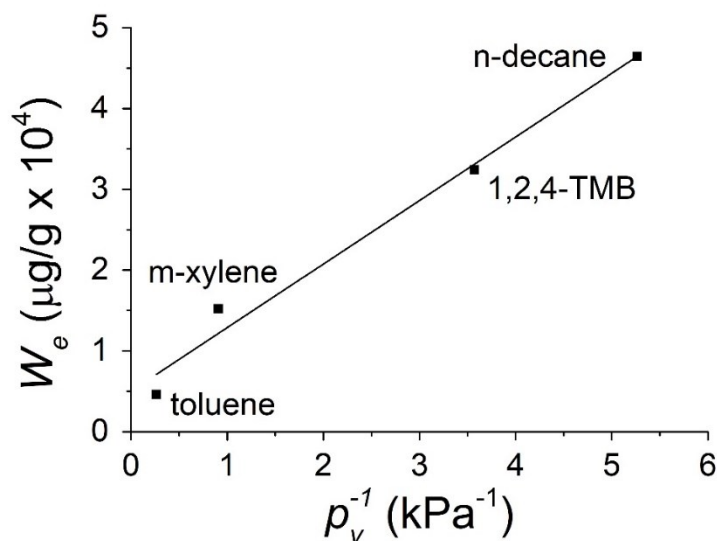

Figure S9.  $W_e$  values of several VOCs with C-X as a function of  $1/(\text{vapor pressure})$ . Vapor pressures of toluene, *m*-xylene, 1,2,4-TMB, and *n*-decane are 3.8, 1.1, 0.28, and 0.19 kPa, respectively ( $R^2 = 0.98$ ).

Table S1. Values of  $M_{b-10}$  for several compounds obtained in published breakthrough tests with C-B and C-X, and the corresponding  $W_e$  values at  $3.5 \text{ mg/m}^3$  derived therefrom. Also included are the estimates of maximum uptake masses on the C-B bed of the  $\mu\text{PP}$  at  $3.5 \text{ mg/m}^3$  for the same compounds.

| Compound         | $M_{b-10}^a$ ( $\mu\text{g}$ ) |     | $W_e^b$ ( $\mu\text{g/g}$ ) |      | C-B Max. Uptake Mass (ng) |
|------------------|--------------------------------|-----|-----------------------------|------|---------------------------|
|                  | C-B                            | C-X | C-B                         | C-X  |                           |
| <i>m</i> -xylene | 12                             |     | 1700                        | 4900 | 1000                      |



|           |     |     |                |      |                |
|-----------|-----|-----|----------------|------|----------------|
| o-xylene  |     |     | 2100           | 6100 | 1300           |
| DMMP      | 3.9 | 11  | 550            | 1600 | 340            |
| DEMP      | 11  |     | 1600           | 4500 | 950            |
| DIMP      | 16  |     | 2300           | 6500 | 1400           |
| NBZ       | 24  |     | 3400           | 9800 | 2100           |
| n-butanol |     | 1.3 | — <sup>c</sup> | 190  | — <sup>c</sup> |

<sup>a</sup>  $M_{b-10}$  values are the 10% breakthrough masses reported in ref. S9; <sup>b</sup>  $W_e$  value estimation processes are discussed in the text; <sup>c</sup> experimental testing reported in ref. S9 showed n-butanol to be unretained on C-B.

TGA testing of the lower volatility compounds DMMP, DEMF, DIMP, and NBZ was not possible due to their adsorption on surfaces and persistence. Therefore, we used alternative methods to estimate  $W_e$  values.

In a separate study of vapor adsorption capacity, we conducted conventional breakthrough tests with packed tubes containing either C-B or C-X exposed continuously to each of several individual test compounds at a single vapor concentration.<sup>S9</sup> Most compounds were only tested with C-B. Measured 10% breakthrough volumes ( $V_{b-10}$ ) were converted to the corresponding 10% breakthrough masses ( $M_{b-10}$ ) to account for the different challenge concentrations used. Theoretically,  $M_{b-10}$  for a given compound should be proportional to  $W_e$  according to the Wheeler Model.<sup>S9</sup> Using m-xylene as the reference compound, the following values of relative  $M_{b-10}$  values were found for breakthrough tests with C-B: 1.0, 0.33, 0.92, 1.3, and 2.0 for m-xylene, DMMP, DEMF, DIMP, and NBZ, respectively.

For one of these compounds, DMMP, we also ran breakthrough tests with C-X, and the C-X:C-B ratio of  $M_{b-10}$  values for DMMP was 2.9 at the same concentration. Assuming that this ratio would be applicable to other vapors, we applied it to the  $W_e$  value of m-xylene on C-X at 3.5 mg/m<sup>3</sup> determined by TGA to obtain an estimate of  $W_e$  on C-B for m-xylene. This specific concentration was arbitrary. Combining this estimate of  $W_e$  with the ratios listed above, it was possible to estimate  $W_e$  on C-B for the other vapors at the same concentration. Breakthrough tests of n-butanol with C-B showed no retention (i.e., immediate breakthrough), whereas with C-X the n-butanol breakthrough volume (mass) was short but measurable, thereby permitting an estimate of  $W_e$ .<sup>S9</sup>

Based on the estimated  $W_e$  values and the measured adsorbent masses, we could also estimate the equilibrium uptake mass for each compound on C-B (the adsorbent in the outer bed of  $\mu$ PP). These estimates of  $W_e$  and uptake mass are presented in Table S1 and were used in the modeling discussed further below.

The  $W_e$  value of o-xylene on C-X was estimated from that of m-xylene at a similar concentration via the plot in Figure S9 by assuming that its  $W_e$  value is proportional to the inverse of vapor pressure, which should be valid for compounds with similar polarities (or, in this case, for an isomer). The  $W_e$  value of o-xylene on C-B was then estimated, as described above, using the ratio of  $W_e$  values on C-X and CB found for DMMP (i.e., 2.9, see above).

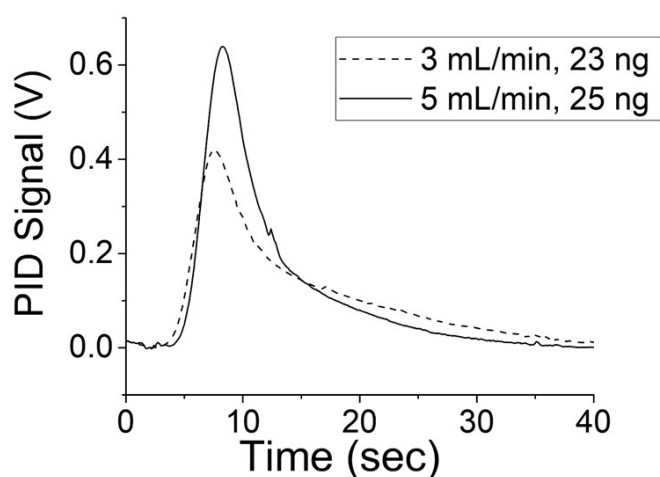

#### S6. Desorption (transfer) profiles and efficiencies

Figure S10. Desorption profiles of o-xylene from the  $\mu$ PP under the two indicated flow rates at 250 °C as measured with an in-line photoionization detector (mini-PID). The indicated masses collected from the test atmosphere were determined. Challenge concentrations were  $\sim 12 \text{ mg/m}^3$ .

To characterize the transfer of o-xylene from the  $\mu$ PP during desorption, we connected a mini-PID between the mini-pump and the outlet of the  $\mu$ PP. Two tests were performed at a similar exposure concentrations and exposure times, but at different desorption flow rates (i.e., 3 mL/min and 5 mL/min). Two consecutive desorption cycles were performed in each case and no desorption peak was observed for the second desorption cycle, confirming that desorption was efficient. The collected masses were similar between two tests as expected. As shown in Figure S10, the profile showed significant tailing but the responses returned to baseline within about 30 sec. The full width at half maximum (FWHM) was 5.7 and 4.7 sec at 3 and 5 mL/min, respectively.

Tables S2 and S3 show the results of desorption tests with DMMP and DEMP, respectively. The *DE* values for DMMP were  $> 97\%$  under all conditions. For DEMP, the *DE* at 250 °C was 85% (data not shown). Increasing  $T_{\text{max}}$  to 275 °C improved the *DE* to 94%. At this  $T_{\text{max}}$ , reducing the transfer time from 60 to 30 sec, resulted in a decrease in *DE* to 78%. Thus, 60 sec at 275 °C at 5 mL/min seemed to be the best condition for transfer.

Table S2. The sampling rates and desorption efficiencies (*DE*) of  $\mu$ PP at 250 °C for DMMP with different transfer conditions (transfer flow rate and transfer time).<sup>a</sup>

| $S_e$<br>(mL/min) | Transfer flow rate<br>(mL/min) | Transfer time<br>(sec) | DE<br>(%) |
|-------------------|--------------------------------|------------------------|-----------|
| 0.44              | 10                             | 240                    | 100       |

|      |    |     |    |
|------|----|-----|----|
| 0.44 | 10 | 120 | 98 |
| 0.43 | 10 | 60  | 97 |
| 0.44 | 5  | 60  | 99 |

<sup>a</sup> Exposures ranged from 24-30 mg/m<sup>3</sup> for 15 min resulting in mass uptakes of 160-200 ng

Table S3. The sampling rates and desorption efficiencies of  $\mu$ PP at a transfer flow rate of 5 mL/min and transfer temperature of 275 °C for DEMP with different transfer time.

| $S_e$<br>(mL/min) | Transfer time<br>(sec) | DE<br>(%) |
|-------------------|------------------------|-----------|
| 0.26              | 60                     | 94        |
| 0.26              | 50                     | 89        |
| 0.25              | 40                     | 79        |
| 0.25              | 30                     | 78        |

<sup>a</sup> Exposures ranged from 54-63 mg/m<sup>3</sup> for 15 min for a total mass load of 210-230 ng.

Table S4. Results of  $\mu$ PP off-gassing tests for o-xylene, DMMP, and DEMP with 4 min and 60 min purge times after exposure.

| Compound | Purge time<br>(min) | Conc.<br>(mg/m <sup>3</sup> ) | Uptake mass<br>(ng) | $S_e$<br>(mL/min) | $S_e$ change<br>(%) |
|----------|---------------------|-------------------------------|---------------------|-------------------|---------------------|
| o-xylene | 4                   | 52                            | 530                 | 0.67              | -6.0                |
|          | 60                  | 59                            | 560                 | 0.63              |                     |
| DMMP     | 4                   | 49                            | 320                 | 0.43              | -19                 |
|          | 60                  | 47                            | 245                 | 0.35              |                     |
| DEMP     | 4                   | 57                            | 210                 | 0.25              | 0                   |
|          | 60                  | 52                            | 190                 | 0.25              |                     |

## S7. Modeling changes in $S_e$ values as a function of time and concentration

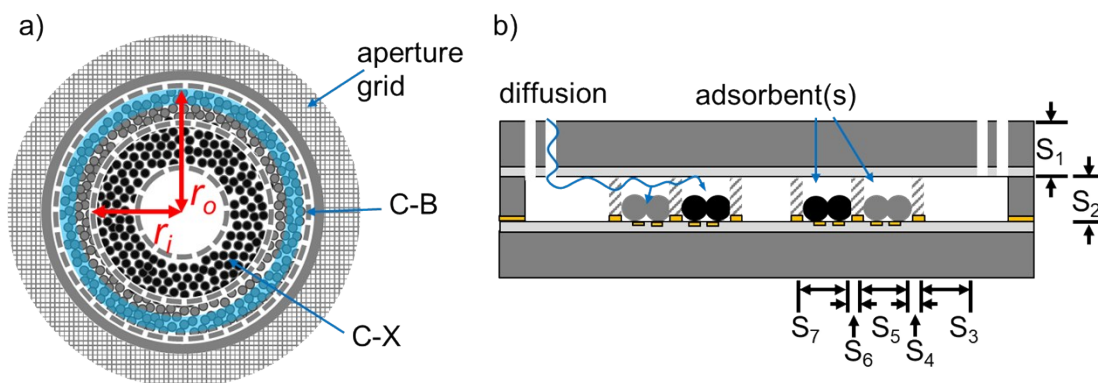

Figure S11. a) Top view of  $\mu$ PP showing radii and adsorbent beds (the blue annulus corresponds to a hypothetical saturated C-B area at a certain time point); b) Enlarged version of Fig. 1b (main text) showing a side view of formalized segments of the diffusion path and individual sampling rates ( $S_1$ - $S_7$ ).

As stated in the main text, to model the effective sampling rate for a given vapor, we formally divided the diffusion path into 7 segments as shown in Figure S11. Each segment is defined as follows:

- Segment 1 corresponds to the aperture grid through which vapors diffuse vertically and for which  $L_1$  is the thickness of the top substrate and  $A_1$  is the product of the aperture cross section ( $47 \times 47 \mu\text{m}$ ) and the number of apertures ( $n = 237$ ).
- Segment 2 corresponds to the space beneath the apertures through which vapors will also diffuse vertically to the floor of the bottom substrate, for which  $L_2$  is the height of the channel ( $380 \mu\text{m}$ ) and  $A_2$  is defined to include the total area of the aperture grid and the spaces between the apertures. Thus, Segment 2 corresponds roughly to the volume of the annular ring beneath the grid of apertures.
- Segment 3 corresponds to the open space adjacent to (just inside of) Segment 2 through which vapors diffuse laterally (inwardly) toward the first ring of retention pillars. For this segment we assume that  $L_3$  is the distance from the edge of Segment 2 to the pillars, and  $A_3$  is the average cross section of the lateral path but at only at the height of adsorbent granules ( $237 \mu\text{m}$ ). The formal assumption here is that the headspace has no vapor.
- Segment 4 is the path through the pillars for which  $L_4$  is the diameter of a pillar and  $A_4$  is the sum of the inter-pillar distances multiplied by the height of the adsorbent granules.
- Segment 5 is the outer (C-B) adsorbent bed through which vapors diffuse laterally. In this case diffusion will be some combination of free (i.e., Fickian) diffusion through the interstitial spaces between the particles and pore (i.e., Knudsen) diffusion within the adsorbent particles. Therefore, the  $D$  value in this segment is assumed to be lower than that in the preceding segments.  $L_5$  is the radial length of entire C-B adsorbent bed, which is only reached by vapor after saturation of the entire adsorbent bed.  $A_5$  decreases physically from the outer to inner boundaries of the adsorbent bed. As with the radial length, the effective value of  $A_5$  over the course of a sampling period will depend on the extent of bed saturation.  $S_5$  will decrease over time and, therefore  $S_e$  will also decrease over time.
- Segment 6 corresponds to the next set of pillars and its dimensions are defined similarly to that of Segment 4, accounting for the lower number of pillars at this point in the device structure.
- Segment 7 is the inner (C-X) adsorbent bed. As in Segment 5, diffusion will be some combination of free (i.e., Fickian) diffusion through the interstitial spaces between the particles and pore (i.e., Knudsen) diffusion within the adsorbent particles. Therefore, the  $D$  value in this segment is also assumed to be lower than that in segments not containing adsorbent.  $L_7$  is the radial length of entire C-X adsorbent bed, which is only reached by vapor after saturation of the entire adsorbent bed.  $A_7$  decreases from the outer to inner boundaries of the adsorbent bed. As with the radial length, the effective value of  $A_7$  over the course of a sampling period will depend on the extent of bed saturation. Since  $S_7$  will decrease over time, it will contribute to a decrease in  $S_e$  for vapors penetrating this bed.

As discussed in the main text, the response time can be estimated by first dividing the volume of each segment  $S1-S4$  its modeled  $S_i$  value ( $i = 1, 2, 3, 4$ ), and then summing the resulting segmental response time values. See Table S5 for the relevant values for o-xylene.

Table S5. Segmental effective sampling rates ( $S_i$ ) and volumes relevant to the calculation of the response time (i.e., time to steady state) of the  $\mu$ PP for o-xylene.<sup>a</sup>

| Segment | $S_i$ (mL/min) | Volume (mm <sup>3</sup> ) | Response Time (msec) |
|---------|----------------|---------------------------|----------------------|
| 1       | 1.3            | 0.094                     | 4.5                  |
| 2       | 2.6            | 0.86                      | 20                   |
| 3       | 13             | 0.18                      | 0.84                 |
| 4       | 3.6            | 0.27                      | 4.5                  |
| Total   |                |                           | 30                   |

<sup>a</sup> Similar calculation for DEMP and DIMP gave values of 60 msec and 77 msec, respectively.

Implicit assumptions in eq. 1 (main text) are that, once steady state is established, all of the  $S_i$  values are constant and all vapor mass transferred into the device is conserved. If  $S_i$  in any segment changes, then it will have a commensurate effect on  $S_e$ . Importantly, eq.1 gives the *instantaneous*  $S_e$  at a certain point in time. If  $S_e$  were to change with time, then a time-averaged  $S_e$  value over the duration of the sampling period would be observed experimentally. Accordingly, the corresponding modeled value would also be averaged over time.

Next we model the instantaneous sampling rates ( $S_5$  and  $S_e$ ) as a function of time, and then calculate the net time-averaged  $S_e$  values over a specified sampling period. We focus on the effect on  $S_e$  of the gradual saturation of the adsorbent in segment 5 (S5) that occurs either over time at a given concentration of vapor or over a range of vapor concentrations at a fixed sample duration. Analogous expressions are used to model  $S_7$ . Considering  $S_5$  in isolation, we have the formal expression:  $S_5 = D_5 A_5 / L_5$ . However, since the effective values of  $A_5$  and  $L_5$  will vary with time and the degree of saturation, we have designated them as  $l_s$  and  $a_s$ . It is assumed that  $D_5$  is constant.

To develop the model, we considered the case where the  $\mu$ PP collects a series of samples over several discrete time periods and transfers the collected mass downstream for analysis (as in Figure 4 for o-xylene). For each time,  $t$ , an injected mass of vapor is measured,  $m_{v(t)}$ . Assuming that the penetration into the bed proceeds only after saturation is achieved in the adjacent upstream fraction of the bed at a given air concentration, we can estimate the saturated adsorbent mass ( $m_{s(t)}$ ) corresponding to each value of  $m_{v(t)}$  by the following:

$$m_{s(t)} = \frac{m_{v(t)}}{W_e} \quad (\text{S-3})$$

where  $W_e$  is the equilibrium adsorption capacity at a given concentration  $C_0$  (see Section S5).

We can also estimate the maximum vapor mass required to saturate the bed,  $m_{v-max}$ , at a given  $C_0$  by the product of  $W_e$  and the total bed mass,  $M_{a-max}$ . We can then determine what fraction of the adsorbent bed,  $f_{s(t)}$ , is saturated after each time period as

$$f_{s(t)} = \frac{m_{s(t)}}{M_{a-max}} \quad (S-4)$$

The total bed area, which we call  $A_{a-max}$  (to differentiate it from the cross sectional area of the diffusion path,  $A$ ), is obtained from the CAD design layout for the device. Multiplying  $f_{s(t)}$  by  $A_{a-max}$  gives the area of the bed,  $\alpha_{s(t)}$ , saturated at time  $t$ . Assuming  $\alpha_{s(t)}$  is evenly distributed around the perimeter of the bed,  $P$ , it would consist of an annulus of adsorbent of radial length  $l_{s(t)}$ . At the point where the adsorbent bed is fully saturated,  $l_{s(t)}$  would equal  $L_5$ . Since  $A_{a-max}$  is the sum of the areas of the saturated and unexposed bed, we have:

$$A_{a-max} = \alpha_{s(t)} + \pi(r_o - l_{s(t)})^2 - \pi r_i^2 \quad (S-5)$$

where  $r_o$  and  $r_i$  are outer and inner radii of the (outer, C-B) adsorbent bed, respectively. Rearranging this equation, we have the following, which can be used to obtain the value of  $l_{s(t)}$  for each  $\alpha_{s(t)}$  corresponding to exposure for any discrete time period:

$$l_{s(t)} = r_o - \sqrt{\frac{A_{a-max} - \alpha_{s(t)} + \pi r_i^2}{\pi}} \quad (S-6)$$

Of course,  $l_s$  and  $\alpha_s$  change continuously with time, and can be expressed as continuous variables. Within an incremental time interval  $dt$  there will be incremental increases in adsorbed vapor mass ( $dm_v$ ), saturated adsorbent area ( $d\alpha_s$ ), and saturated radial length ( $dl_s$ ). Furthermore, the following equality should hold:

$$\frac{dm_v}{m_{v-max}} = \frac{d\alpha_s}{A_{a-max}} \quad (S-7)$$

and  $d\alpha_s$  can be expressed as the product of the perimeter of the unexposed bed ( $P_u$ ) and  $dl_s$  as follows:

$$d\alpha_s = P_u dl_s = \pi(2r_o - 2l_s) dl_s \quad (S-8)$$

Assuming  $S_e$  is constant within this interval, then  $dm_v$  can be expressed as follows:

$$dm_v = S_e C_0 dt \quad (S-9)$$

Limiting this analysis to the first five segments, eq. 1 (main text) can be expressed as follows:

$$S_e = \frac{1}{\frac{1}{S_1} + \frac{1}{S_2} + \frac{1}{S_3} + \frac{1}{S_4} + \frac{1}{S_5}} = \frac{1}{\frac{L_1}{DA_1} + \frac{L_2}{DA_2} + \frac{L_3}{DA_3} + \frac{L_4}{DA_4} + \frac{l_s}{D_5 a_s}} \quad (\text{S-10})$$

where  $D$  is the Fickian diffusion coefficient (listed in Table 1 of the main text), and  $D_5$  is the diffusion coefficient in S5, which is assumed to be smaller than  $D$  by virtue of the contribution of (slower) pore diffusion (see above), and  $a_s$  is the cross-sectional area at the inner edge of the saturated region of the bed. The latter is the product of  $P_u$  and the height of adsorbent bed ( $h$ ):

$$a_s = P_u h = \pi(2r_o - 2l_s)h \quad (\text{S-11})$$

Since  $S_1$ - $S_4$  are constant at steady state, Eq. S-10 can be simplified to:

$$S_e = \frac{1}{\sigma_{1-4} + \frac{l_s}{D_5 h \pi (2r_o - 2l_s)}} \quad (\text{S-12})$$

where  $\sigma_{1-4} = 1/S_1 + 1/S_2 + 1/S_3 + 1/S_4$ .

Substituting the expression for  $S_e$  in Eq. S-10 into Eq. S-9, and then substituting the expressions for  $da$  and  $dm_a$  in Eqs. S-8 and S-9 into Eq. S-7 and rearranging gives:

$$\frac{\Lambda_{a-\max} C_0}{m_{v-\max} \pi} dt = \left[ (2r_o - 2l_s) \sigma_{1-4} + \frac{l_s}{D_5 h \pi} \right] dl_s \quad (\text{S-13})$$

Eq. S-13 has only two variables,  $t$  and  $l_s$ . All the other parameters in the equation are constant (note:  $D_5$  is also a constant, but its value is unknown). Thus, the left-hand side is integrable with respect to  $t$ , and the right-hand side is integrable with respect to  $l_s$ .

Imposing the boundary condition that  $l_s = 0$  when  $t = 0$  and integrating both sides of eq. S-13 gives an equation relating  $l_s$  to  $t$  wherein all the determinant variables are known except for  $D_5$ :

$$\frac{\Lambda_{a-\max} C_0}{m_{v-\max} \pi} t = 2r_o \sigma_{1-4} l_s + \frac{l_s^2}{2} \left( \frac{1}{D_5 h \pi} - 2\sigma_{1-4} \right) \quad (\text{S-14})$$

The required value of  $D_5$  must be determined empirically for each vapor. For o-xylene, for example, experimental values of  $l_{s(t)}$  were calculated via Eq. S-6 for each of the six cases shown in Figure 4 (main text) for which  $m_{v(t)}$  values were measured at each  $t$ . The corresponding



modeled values of  $l_s$  are expressed in Eq. S-14 as a function of  $D_5$  for each case at the same (known) value of  $t$ . Thus, each discrete modeled value  $l_{s(t)}$  now depends only on  $D_5$ . By iteratively solving Eq. S-14 using  $D_5$  values ranging incrementally from 0 (lower bound) to the Fickian  $D$  value (upper bound, i.e., 0.072 cm<sup>2</sup>/sec for o-xylene), the optimal value was determined as that providing smallest relative error between modeled  $l_s$  values at time  $t$  and experimental  $l_{s(t)}$  values.

For o-xylene, the resultant value of  $D_5$  was 0.025 cm<sup>2</sup>/sec and for DEMP the  $D_5$  value obtained by the same approach was 0.015 cm<sup>2</sup>/sec. With these optimized  $D_5$  values and Eq. S-14, we can model  $l_s$  for any  $t$  assuming the vapor is retained in the C-B bed. By substituting the modeled  $l_s$  value into Eq. S-12, we can then obtain the modeled instantaneous  $S_e$  value for any  $t$ , again, assuming the vapor is retained in the C-B bed.

For comparison with experimental  $S_e$  values, we need to determine the time-averaged  $S_e$  value over a certain time period. A sufficiently accurate estimate can be obtained by calculating  $S_e$  at each 1-minute interval via eq. S-12, summing, and dividing by the total time. The modeled results for DEMP and o-xylene are presented alongside the experimental  $S_e$  values in Figures 4 and 5, respectively, in the main text.

An analogous approach would be used to estimate  $D_7$  in the C-X bed for any vapors that penetrate beyond the C-B bed during sampling. In fact, for o-xylene, the model predicts penetration into the C-X bed after ~14 hr at the modeled concentration of 3.5 mg/m<sup>3</sup>. Since we did not have the data required to estimate  $D_7$  in the same manner as we estimated  $D_5$ , it was assumed that  $D_7$  was equivalent to  $D_5$ . For the purpose of modeling the 24-hr  $S_e$  value presented in Figure 5 (main article). Given the higher specific surface area and packing density, as well as the different pore-size distribution of C-X (vs. C-B), it is likely that  $D_7$  would be somewhat lower than  $D_5$ . Accordingly, the model underestimates  $S_e$  for the 24-hr sample of o-xylene.

Thus far, we have only dealt with modeling how the sampling rate changes with time. Using the same approach, it is possible to model the  $S_e$  as a function of concentration for a fixed time period. The same optimized  $D_5$  value can be used. For any specified concentration,  $C_0$ , we need to calculate the corresponding  $W_e$  value from TGA measurements or by the approach described above from breakthrough testing. This, then, will give a new  $m_{v-max}$  value. With  $C_0$  and  $m_{v-max}$  values, we can use eq. S-14 to model  $l_s$  at any  $t$ , followed by calculation of the instantaneous and time-averaged  $S_e$  values via eq. S-12. The results for o-xylene are shown in Figure 3 (main article).

Unfortunately, modeling  $S_e$  for an untested compound would not be possible because of the need for an optimized  $D_5$  value, which must be derived empirically as we did above. As we discuss in the next section, for o-xylene and DEMP the ratios of the Fickian  $D$  value to the  $D_5$  value were 2.9 and 2.4 respectively (i.e., 0.072/0.025 and 0.036/0.015, respectively). Assuming that the average ratio for these two compounds (i.e., 2.7) could be applied to any other compound, we could then estimate  $D_5$  for untested vapors for which we have Fickian  $D$  values. For the few cases in Table 1 of the main text for which we had  $W_e$  values, we used this approach to model their 0.25-hr  $S_e$  values. However, due to the short time period the change in  $S_e$  as a function of time was too small to allow an assessment of the reliability of this approach to estimating  $D_5$ .

## S8. Calculations of Fickian diffusion coefficients (D)

Fickian  $D$  values were obtained from the literature for six of the compounds listed in Table 1 (i.e., m-xylene, o-xylene, NBZ, DMMP, n-butanol, and DMF).<sup>S10-S12</sup> Since published values could not be found for the remaining nine compounds, they were calculated by one of two methods.<sup>S10,S13-S15</sup> One of these, Fuller's method, has shown the best agreement with experimental values (generally < 10 %, although errors as large as > 60% have been reported).<sup>S10</sup> This method was used to estimate Fickian  $D$  values for all but two of the compounds for which published  $D$  values were lacking. The exceptions are the two phosphonates, DEMP and DIMP, for which the requisite atomic diffusion volumes have apparently not been reported. Therefore, an alternative method was used to calculate  $D$  values for these compounds.<sup>S15</sup>

In Fuller's method, the  $D$  value (torr cm<sup>2</sup>/sec) of vapor A in gaseous matrix B (i.e.,  $D_{AB}$ ) is expressed as follows:<sup>S11</sup>

$$D_{AB} = \frac{1.0868T^{1.75}}{\sqrt{\frac{2m_A m_B}{m_A + m_B} (\sqrt[3]{V_A} + \sqrt[3]{V_B})^2}} \quad (\text{S-15})$$

where  $T$  is temperature (K),  $V_A$  and  $V_B$  are the so-called molecular diffusion volumes of A and B, and  $m_A$  and  $m_B$  are their respective molecular weights. B is air in this study. The molecular diffusion volume is the sum of the atomic diffusion volumes of the atoms comprising the molecule, weighted by an adjustment factor related to the structure of the molecule (e.g. branching, aromatic ring, or heterocyclic ring). Values of the atomic diffusion volumes and the structural weighting factors can be found.<sup>S10,S13,S14</sup> Atmospheric pressure was assumed to be 760 torr when converting  $D_{AB}$  values to units of cm<sup>2</sup>/sec.

For DEMP and DIMP, an alternative method was used, which expresses  $D_{AB}$  as follows:<sup>S14</sup>

$$D_{AB} = \frac{1}{3n\sigma_{AB}m_A} \sqrt{\frac{8kLT}{\pi} \left( \frac{m_A m_B}{m_A + m_B} \right)} \quad (\text{S-16})$$

where  $L$  is the Avogadro constant,  $n$  is the concentration of air molecules,  $\sigma_{AB}$  is the effective collision cross section, and  $k$  is Boltzman constant. To calculate  $D_{AB}$  values for DIMP and DEMP, we need to know the values of parameters on the right-hand size of the equation. All parameters in this equation are available from the literature except for  $\sigma_{AB}$ .<sup>S16</sup> To estimate  $\sigma_{AB}$  value, a molecular modelling package (VEGA ZZ)<sup>S17</sup> was used to obtain the molecular volumes of DEMP and DIMP. Assuming their molecules to be spherical, the molecular diameters can be estimated and a  $\sigma_{AB}$  value for DEMP and DIMP can be obtained.

As a check on the accuracy of eq. S-16,  $D_{AB}$  values of DMMP and m-xylene in air were calculated using this equation and compared to those reported in the literature or calculated by use of Fuller's method. Using eq. S-16, the  $D_{AB}$  values for DMMP and m-xylene are 0.015 cm<sup>2</sup>/s and 0.017 cm<sup>2</sup>/s, which are 30% and 25% of the reported  $D_{AB}$  values, respectively. Thus, it appears that eq. S-16 significantly underestimates  $D_{AB}$ . To account for this, we used 0.3 as an adjustment factor and used it to re-calculate the  $D_{AB}$  values of DEMP and DIMP, i.e., we divided the estimated  $D_{AB}$  values of DEMP and DIMP based on the eq. S-16 by the 0.3. These are the values reported in Table 1.

Note that if we use our experimental  $S_e$  values (Table 1) to back-calculate  $D_{AB}$  for DEMP and DIMP, we obtain values of 0.029 and 0.023 cm<sup>2</sup>/sec, respectively, which are probably at least as accurate and reliable as the those calculated using the approach described above. The lack of published  $D_{AB}$  values for organophosphonates such as these and of a reliable means of calculating them is an unfortunate situation that merits further study and resolution.

## S9. Tests with vapor mixtures

Table S6 lists the concentrations, collected masses, exposure times, and observed  $S_e$  and DE values for o-xylene and DEMP for the tests involving exposures to mixtures of these two compounds with and without other compounds present. In the case of the 8-compound mixture, data for all 8 compounds are provided in Table S7.

*Table S6. Results of exposures to o-xylene and DEMP individually and in various mixtures showing no effect on observed  $S_e$  values from the presence of other vapors.*

| Test              | Compound | Conc.<br>(mg/m <sup>3</sup> ) | Collected mass<br>(ng) | Exposure time<br>(min) | $S_e$<br>(mL/min) | DE<br>(%) |
|-------------------|----------|-------------------------------|------------------------|------------------------|-------------------|-----------|
| Single<br>cmpd    | o-xylene | 42                            | 440                    | 15                     | 0.69              | 99        |
|                   | DEMP     | 49                            | 190                    | 15                     | 0.26              | 91        |
| 2-cmpd<br>mixture | o-xylene | 370                           | 7,500                  | 30                     | 0.68              | 99        |
|                   | DEMP     | 87                            | 660                    | 30                     | 0.25              | 87        |
| 5-cmpd<br>mixture | o-xylene | 110                           | 2,200                  | 30                     | 0.68              | 99        |
|                   | DEMP     | 14                            | 110                    | 30                     | 0.26              | 88        |
| 8-cmpd<br>mixture | o-xylene | 6.2                           | 130                    | 30                     | 0.71              | 99        |
|                   | DEMP     | 9.0                           | 68                     | 30                     | 0.25              | 80        |

*Table S7. Results of exposures to eight compounds individually and as a mixture showing no effect on observed  $S_e$  values from the presence of other vapors.*

| Test                | Compound | Conc.<br>(mg/m <sup>3</sup> ) | Collected mass<br>(ng) | Exposure time<br>(min) | $S_e$<br>(mL/min) | DE<br>(%) |
|---------------------|----------|-------------------------------|------------------------|------------------------|-------------------|-----------|
| Individual<br>cmpds | m-xylene | 44                            | 420                    | 15                     | 0.65              | 99        |

|                    |                   |     |     |    |      |    |
|--------------------|-------------------|-----|-----|----|------|----|
|                    | cyclohexanol      | 42  | 390 | 15 | 0.62 | 98 |
|                    | CEES              | 36  | 380 | 15 | 0.67 | 97 |
|                    | cyclohexanone     | 23  | 240 | 15 | 0.64 | 96 |
|                    | DMMP              | 24  | 160 | 15 | 0.44 | 98 |
|                    | DIMP <sup>a</sup> | 19  | 120 | 15 | 0.21 | 90 |
| 8-compd<br>mixture | m-xylene          | 6.0 | 120 | 30 | 0.68 | 99 |
|                    | cyclohexanol      | 1.9 | 37  | 30 | 0.62 | 98 |
|                    | CEES              | 2.9 | 63  | 30 | 0.70 | 99 |
|                    | cyclohexanone     | 12  | 250 | 30 | 0.65 | 99 |
|                    | DMMP              | 6.0 | 76  | 30 | 0.42 | 84 |
|                    | DIMP              | 6.6 | 45  | 30 | 0.22 | 82 |

<sup>a</sup> These DIMP data were obtained from the 5-compound mixture test.

## References

- S1. J. S. Mitchell, G. R. Lahiji and K. Najafi, *Proceedings of International Electronic Packaging Technical Conference and Exhibition (IPACK) '05*, July 17-22, 2005, San Francisco, CA, pp. 2041-2045
- S2. J. Bryant-Genevier and E. T. Zellers, *J. Chromatogr. A*, 2015, **1422**, 299-309.
- S3. G. O. Wood, *Carbon*, 1992, **30**, 593-599.
- S4. F. Rouquerol, J. Rouquerol, K. S. W. Sing, P. Llewellyn and G. Maurin, *Adsorption by powders and porous solids: principles, methodology and applications*, Academic press, New York, 2013.
- S5. Y.C. Chuang, P. C. Chiang and E. Chang, *Chemosphere*, 2003, **53**, 17-27.
- S6. K.-J. Kim, C.-S. Kang, Y.-J. You, M.-C. Chung, M.-W. Woo, W.-J. Jeong, N.-C. Park and H.-G. Ahn, *Catalysis Today*, 2006, **111**, 223-228.
- S7. F. D. Yu, L. A. Luo and G. Grevillot, *Journal of Chemical & Engineering Data*, 2002, **47**, 467-473.
- S8. F.-Y. Yi, X.-D. Lin, S.-X. Chen and X.-Q. Wei, *Journal of Porous Materials*, 2009, **16**, 521-526.
- S9. J. Wang, J. Ma and E. T. Zellers, *J. Chromatogr. A*, **1609**, 2020, 460486
- S10. M. Tang, M. Shiraiwa, U. Pöschl, R. Cox and M. Kalberer, *Atmospheric Chemistry and Physics*, 2015, **15**, 5585-5598.
- S11. G. Lugg, *Analytical Chemistry*, 1968, **40**, 1072-1077.
- S12. J. T. Hunter and N. L. Abbott, *Sensors and Actuators B: Chemical*, 2013, **183**, 71-80.
- S13. E. N. Fuller, P. D. Schettler and J. C. Giddings, *Industrial & Engineering Chemistry*, 1966, **58**, 18-27.
- S14. E. N. Fuller, K. Ensley and J. C. Giddings, *The Journal of Physical Chemistry*, 1969, **73**, 3679-3685.
- S15. D. A. Trubitsyn and A. V. Vorontsov, *The Journal of Physical Chemistry B*, 2005, **109**, 21884-21892.
- S16. pubChem, <https://pubchem.ncbi.nlm.nih.gov/> (accessed December 2019).
- S17. VEGA ZZ, [https://nova.disfarm.unimi.it/manual/pages/gl\\_index.htm](https://nova.disfarm.unimi.it/manual/pages/gl_index.htm) (accessed December 2019).
